# Supplementary material for: The Association of Self-Reported Birthweight with Lung Function and Respiratory Diseases: Results from a Multi-Centre, Multi-Case Control Study in Italy
Source: MDPI journal article supplement (doi:10.3390/ijerph192215062), 2022-11-16
Supplement: s1 [file s1]

# Supplementary Materials

**Table S1.** Adjusted<sup>1</sup> differences (95% CI) in median FEV1 and FVC by birthweight, case status, sex, age and height, estimated by median regression and adjusting standard errors for intra-centre correlation (n = 2049).

|                              | Difference (95% CI) in<br>Median FEV1 (mL) | <i>p</i> Value   | Difference (95% CI) in<br>Median FVC (mL) | <i>p</i> Value   |
|------------------------------|--------------------------------------------|------------------|-------------------------------------------|------------------|
| <b>Low vs. normal BW</b>     | 9 (-60;77)                                 | 0.806            | -10 (-81;63)                              | 0.795            |
| <b>COPD</b>                  | -925 (-1024;-825)                          | <b>&lt;0.001</b> | -333 (-655;-10)                           | <b>0.043</b>     |
| <b>Asthma</b>                | -230 (-294;-166)                           | <b>&lt;0.001</b> | -52 (-186;83)                             | 0.450            |
| <b>Allergic rhinitis</b>     | -78 (-118;-38)                             | <b>&lt;0.001</b> | -8 (-117;101)                             | 0.882            |
| <b>Sex (female vs. male)</b> | -572 (-643;-501)                           | <b>&lt;0.001</b> | -675 (-758;-592)                          | <b>&lt;0.001</b> |
| <b>Age (per class)</b>       |                                            |                  |                                           |                  |
| <b>35-49</b>                 | -270 (-339;-201)                           | <b>&lt;0.001</b> | -184 (-277;-92)                           | <b>&lt;0.001</b> |
| <b>50-64</b>                 | -611 (-659;-561)                           | <b>&lt;0.001</b> | -493 (-536;-449)                          | <b>&lt;0.001</b> |
| <b>≥65</b>                   | -1172 (-1520;-825)                         | <b>&lt;0.001</b> | -1093 (-1349;-837)                        | <b>&lt;0.001</b> |
| <b>Height (per cm)</b>       | 38 (36;42)                                 | <b>&lt;0.001</b> | 54 (52;58)                                | <b>&lt;0.001</b> |

<sup>1</sup> Adjusted for all factors in the table.
